# Supplementary material for: Preprint: Data from a Systematic Review of Crowdsourcing of Research Data from Wildlife Tourism Photographs and Comments Shared on Social Networking Sites
Source: Preprints.org preprint supplement (doi:10.20944/preprints201908.0232.v1), 2019-08-22
Supplement: Supplementary file 3 [file supplementary]

## Sheet: Master table
Author (year)	Year	Journal	Location of study (country)	Location (continent)	Target species	Focus of study	Social or ecological based	Photographs uploaded/ taken by	Online platform - dedicated vs social network site (SNS)	Name of dedicated platform	Name of social network site	Name of other	Method (Qualitative or Quantitative)	Review or research paper	Sample size (Number of photos)	Sample size (Number of photos - grouped)	Sample period	Sample period (grouped)	Geotagging	Main findings	Future research	People vs. Ecological
Willemen et al. (2015)	2015	PLoS ONE	N/A	Africa	IUCN Red List Threatened Species (African animal and plant species)	Quantifying cultural benefits of nature-based tourism by assessing the tourism attractiveness of species in each African PA using the IUCN Red List of Threatened Species. Creation of a species attractiveness index using photos posted on social media.	Social	General public	SNS	N/A	Flickr	N/A	Quantitative	Research	N/A	N/A	N/A	N/A	No	Social media based index gives insight into what species are most popular globally. Findings highlight need for management strategies aimed at safeguarding biodiversity and ecosystem services. Social media offers a rich source of data and a promising new way to assess measures such as cultural ecosystem services.	N/A	1
Davies et al. (2012)	2012	Wildlife Research	Maldives	Asia	Whale shark	Exploring the suitability of identification-photographs available from online databases to produce assessments of life-history parameters and conservation status of whale sharks in the Maldives	Ecological	General public & Researchers	Dedicated and SNS	ECOCEAN Whale Shark Photo-Identification Library	Flickr, Youtube	N/A	Quantitative	Research	604	500-1000	2003-2008	Greater than 5 years	No	Photo-identification data of whale sharks sourced from the public is appropriate for use in mark–recapture modelling, allowing for the reliable estimation of life-history parameters and local population abundance in the Maldives through time.	Monitoring studies that include all elements of the population, requiring the monitoring of the species at an international scale.	2
Barry (2014)	2014	Environmental Mangement	USA	North America	N/A	Investigating the use of data generated from Flickr as an alternative way to gain insight into public values, attitudes, and concerns about cattle and grazing on park and open sapce lands.	Social	General public	SNS	N/A	Flickr	N/A	Both	Research	1087	1000-10000	2002- 2009	Greater than 5 years	No	Flickr can provide insight through photos and comments into public perspectives on grazing in parks and open space lands. Further analysis of social media may provide managers with broader insights into public opinion on a range of issues important to park management.	Further analysis of social media needed to provide managers with broader insights into public opinion compared to those afforded by traditional methods on a wide range of issues important to park management.	1
Sonter et al. (2016)	2016	PLoS ONE	USA	North America	N/A	Investigating nature-based recreation within conserved lands using geotagged photographs uploaded to the photo-sharing website Flickr to quantify visits by in-state and out of-state visitors.	Social	Tourists	SNS	N/A	Flickr	N/A	Quantitative	Research	N/A	N/A	2007-2014	Greater than 5 years	Yes	Social media data can be used to indicate visits to conserved lands. High degree of variability was due to whether visits were by in- or out-of-state visitors. Identified eight landscape attributes explaining spatial distribution of visits to conserved lands . These results aligned with our local knowledge of recreation preferences and activities by in-state and out-of-state visitors.	Examine landscape attributes that explain both the spatial distribution and temporal changes in nature-based recreation	1
Norman et al. (2016)	2016	Pacific Conservation Biology	Australia	Australia	Whale shark	Investigate whale shark movement patterns beyond Ningaloo Reef	Ecological	General public & Researchers	Dedicated	Wildbook for Whale Sharks	N/A	N/A	Quantitative	Research	N/A	N/A	1995-2014	Greater than 5 years	No	Whale sharks are distributed further along the Western Australian coast than just at Ningaloo Reef, and that these individuals appear to aggregate seasonally at Ningaloo Reef. Results presented in this study demonstrate the benefit of combining citizen science with minimal-impact electronic tracking studies to determine whale shark movements over an extended timeframe.	N/A	2										1
Tonge et al. (2013)	2013	Australian Geographer	Australia	Australia	N/A	Exploring place meanings ascribed by campers to the Ningaloo Coastline, North-western Australia using a photo-elicitation approach	Social	Tourists	N/A	N/A	N/A	N/A	Qualitative	Research	206	100-500	July 2009	Less than 1 month	No	Visitors were receptive to the idea of taking photographs, probably as this is often an activity undertaken while on holiday. Photographs provide an ideal platform for exploring, in subsequent interviews, the emotional elements of place.	Explore further this meaning of ‘everybody’s happy’. It seems to characterise recreational activities, so related studies in other recreational settings would help rapidly advance our understanding of this emergent concept.	1
Hansen (2016)	2016	Journal of Outdoor Recreation and Tourism	Sweden	Europe	N/A	To test how visitor produced pictures can be applied in recreation management in order study, and potentially also monitor, different visitor experience qualities. To support this goal, a case study from Sweden is introduced wherein visitor produced pictures are the main methodological approach.	Social	Tourists	N/A	N/A	N/A	N/A	Qualitative	Research	558	500-1000	Summer 2014	1-6 months	No	Visitor produced pictures offer a unique way to examine experiential content that is not easily communicated in written/ verbal forms. . Practical challenges: Recruitment, participant refusal due to lack of time/ interest, skeptical attitude towards purpose and conserquences. Too much data can be difficult to manage. Idea of involving new technology is introduced - future potential for a download…	Need to further explore: Potential and limitations of technology based strategies. Also, issue that voluntary participation attracts response from visitors with already positive attitudes, potentially overshadowing more critical opinions.	1
Mackay & Couldwell (2004)	2004	Journal of Travel Research	Canada	North America	N/A	Examine the utility of visitor employed photography (VEP) as a method to elicit destination (site) image. Specifically, the objectives are to elucidate the benefits, drawbacks, and implications of using VEP in the study of tourist destination images.	Social	Tourists	N/A	N/A	N/A	N/A	Qualitative	Research	1642	1000-10000	42 days	1-6 months	No	Results provide initial support of the usefulness of VEP to generate images of a tourist attraction and to facilitate meaningful practical and theoretical integration of visitor-determined images with destination-determined images.	Replication of this type of research at other tourism destinations and attractions is required to provide more comprehensive scrutiny of VEP.	1
Vantieghem et al. (2016)	2016	Journal of Insect Conservation	Belgium	Europe	Skipper butterfly	Investigation on the quality of opportunistic citizen science data through a case study on three skipper butterflies (Hesperiidae) in Flanders (northern Belgium) using photographs uploaded with observations in data portals.	Ecological	General public	Dedicated	Waarnemingen	N/A	N/A	Quantitative	Research	18,958	Greater than 10000	2011-2015	2-5 years	No	Inexperienced volunteer recorders are likely to induce errors in public online data portals. Quality checks of such data are essential to assure their correct use. Unverified citizen science data may lead to inappropriate conservation and policy measures.	N/A	2
Dunbar et al. (2016)	2016	Marine Turtle Newsletter	Peru	South America	N/A	Reflections on the first sea turtle Photo ID workshop - ideas and methods on current PID platforms and uses.	Ecological	N/A	Dedicated	Pic4Turtle Image-Based Ecological Information System (IBEIS) Wildbook	N/A	N/A	Qualitative	Review	N/A	N/A	N/A	N/A	Yes	Common themes that came out of the presentations were: the requirement for high quality images repeatedly taken from approximately the same angles and distances; the need to manipulate all photos with spots, lines, or polygons; the lack of analytical power within current PID programs; the need for meta-data handling within PID systems; the lack of connectivity between current PID programs which l…	N/A	2
Richards & Friess (2015)	2015	Ecological Indicators	Singapore	Asia	N/A	Analysing the provision of cultural ecosystem services (CES) at four mangrove sites using social media data, particularly geo-tagged photographs.	Social	General public	SNS	N/A	Flickr	N/A	Both	Research	683	500-1000	2012-2014	1-2 years	Yes	CES indicators derived from social media could be rapid and cost-effective tools for researchers, managers and decision-makers to quickly assess CES provision at fine spatial scales, aiding the future management and conservation of culturally important ecosystems.	N/A	1
Levin et al. (2015)	2015	Ecological Applications	N/A	N/A	N/A	Quantifying human presence beyond populated areas using two global-scale data sets, including night-light intensity and Flickr photos.	Social	General public	SNS	N/A	Flickr	N/A	Quantitative	Research	187000000	Greater than 10000	Up to May 2013	Greater than 5 years	Yes	The number of Flickr photographers within protected areas was found to be reliable surrogate for estimating visitor numbers. Citizen science offers a powerful tool for generating and analyzing data for ecology and biodiversity research, and social media APIs can be used to perform data mining and analyze various research questions. Combined use of satellite imagery with social media data provides…	N/A	1
Heikinheimo et al. (2017)	2017	International Journal of Geo-Information	Finland	Europe	N/A	To see how well social media data content corresponds to results derived from traditional national park visitor surveys.	Social	General public	SNS	N/A	Instagram	N/A	Quantitative	Research	19939	Greater than 10000	Geotagged posts: January 2014 to May 2016.	2-5 years	Yes	Comparison of survey and social media data demonstrated that geotagged social media content provides relevant information about visitors’ use of the national park. Social media can provide a source for continuous monitoring of what is happening in an area. It may reveal changes in trends and bring up emerging activities in the park. Such information is crucial for conservation authorities to info…	Understanding the inherent biases in the geographies and user base of data samples from social media.	1
Araujo et al. (2016)	2016	Aquatic Conservation: Marine and Freshwater Ecosystems	Phillipines	Asia	Whale shark	Using photo-ID and citizen science to investigate population structure, residency patterns and mvements of whale sharks in Southern Leyte, Phillipines.	Ecological	General public	Dedicated and SNS	Wildbook for Whale Sharks	Youtube, Vimeo, Flickr and Facebook	N/A	Quantitative	Research	85	50-100	Citizen science data: February 2014-August 2014	1-6 months	Yes	Photo-ID is a powerful research tool to investigate the dynamics of whale shark aggregations. Involving the public in conduct citizen science by gathering identification data is a method to broaden the scope of databases, when assumptions are met and proper protocols and education are instigated. Local communities can also be included in data collection and help raise awareness, as well as provid…	Future research should focus on the effects of environmental variables on both shark encounter rates and detectability.	2
Wood et al. (2013)	2013	Scientific Reports	USA	North America	N/A	Assessment of the relationship between the locations of photographs from the image-sharing website Flickr and empirically derived visitation rates at sites around the world. This is the first study to ground-truth the use of data from social media to predict visitation rates.	Social	General public	SNS	N/A	Flickr	N/A	Both	Research	N/A	N/A	N/A	N/A	Yes	Crowd-sourced information provides revolutionary information for understanding questions about where people recreate.	Further work is needed to explore the utility of this approach at locations that are not major attractions or landmarks. Other social media such as geotagged tweets might serve as more effective proxies for some types of recreation, particularly in urban areas.	1
Cong et al. (2014)	2014	Tourism Management	China	Asia	Giant Panda	Understanding Giant Panda and tourist interaction experiences. Content analysis of tourist reviews on social media	Social	Tourists	SNS	N/A	TripAdvisor	N/A	Qualitative	Both	N/A	N/A	N/A	N/A	No	Managers/ operators should continuously be seeking new ways to improve photo-taking arrangements and services. The taking of photos is very important in recording tourists’ experiences and so the arrangements made for photography are critical.	Future research should consider invoking theories that may more fully explain tourist experiences and behaviours at sites. For example, involvement theory has been extensively applied in tourism research (Brey & Lehto, 2007) and might bevery relevant in this particular context.	1
Palomino et al. (2016)	2016	International Journal of Environmental Research and Public Health	N/A	N/A	N/A	Utilizing Twitter to explore the online dissemination and sentiment associated with the concept of Nature-deficit disorder (NDD) and other nature–health related concepts. This work aims to build a dataset that will enable in-depth qualitative analysis of tweets linked to NDD published by the general public.	Social	General public	SNS	N/A	Twitter	N/A	Both	Research	N/A	N/A	2 months	1-6 months	No	Unique features of social media, such as mass customization, interactivity and convenience are beneficial to health communication and promotion efforts. Convert what would have been “private” health entries in a journal into interactive “public” disclosures and potential points of discussion.	Expland Twitter content analysis into individual users vs. commercial or non-profit organizations, in order to better understand their divergent opinions	1
Roberge (2014)	2014	Biodiversity Conservation	USA	North America	Species listed as threatened or endangered under the U.S. Endangered Species Act.	Quantifying the level of public attention toward different mammal and bird species listed under the United States’ Endangered Species Act (ESA) through analyses of posted messages on Twitter.	Social	General public	SNS	N/A	Twitter	N/A	Quantitative	Research	N/A	N/A	August 2011- July 2012	6 months - 1 year	No	Results suggest Twitter users interact about a biased sample of ESA listed species. Findings can be used for prioritizing conservation education and marketing campaigns aiming to raise the profile of lesser-known listed species. Data from online social networks open the door for a range of novel applications in conservation science.	Future consideration should also be given to taxonomic groups not included in the present study, such as reptiles, amphibians, fish, invertebrates, plants and fungi. Microblogs and other social networking services offer much potential for future studies, which should be based on refined categorization schemes and analytical methods developed in the social sciences.	1
Speed et al. (2007)	2007	Frontiers in Zoology	Australia	Australia	Whale shark	To assess the reliability of the Interactive Individual Identification System (I3S) that recognizes spot patterns for use in photo-identification studies of wildlife.	Ecological	Tour operators & Researchers	Dedicated	Whale shark photo library	N/A	N/A	Quantitative	Research	797	500-1000	1992-2006	Greater than 5 years	No	The software availability and applicability of I3S for a wide range of animals enables researchers to store and match images for mark-recapture purposes. Reliable, effective photo-identification for animals with stable, natural markings is now possible for anyone with a digital camera.	N/A	2										1
Keeler et al. (2015)	2015	Frontiers in Ecology and the Environment	USA	North America	N/A	To assess the recreational value of changes in water quality using freely available geotagged photographs, taken by members of the public, as a proxy for recreational visits to lakes.	Social	General public	SNS	N/A	Flickr	N/A	Both	Research	41852	Greater than 10000	January 2005 - December 2012	Greater than 5 years	Yes	There are limitations to the use of social-media data to estimate recreational behavior. We recognize that Flickr users are not necessarily representative of all recreationists, users were more likely to be female and of higher educational status than users that responded to surveys. Need for further investigations into sources of bias, representation, and interpretation in social media related d…	Further investigations into sources of bias, representation, and interpretation in social-media-related data.	1
Straumann et al. (2014)	2014	The Cartographic Journal	Switzerland	Europe	N/A	Exploring methodological steps towards (re)constructing collective narratives from the photo taking behaviour of two groups (tourists and inhabitants of Switzerland) by analysing spatial and temporal patterns in user-contributed, georeferenced photographs of Zurich, Switzerland	Social	General public	SNS	N/A	Flickr	N/A	Both	Both	81194	Greater than 10000	2005-2011	Greater than 5 years	Yes	Geocoded photos allow us to explore the idea that we can, observe aspects of people’s spatial behaviour without intruding into their experiences and without violating their privacy.	Combine analysis with a point-of-interest database, further analyse the photocontent (e.g. via tag analysis or ‘geo-photo browser’ tool), to identify private and/or public events and participation by domestic versus foreign visitors.	1
Zhang et al. (2012)	2012	N/A (ACM conference proceedings)	USA	North America	N/A	Investigating the particular problem of estimating geotemporal distributions of ecological phenomena using geo-tagged, time-stamped photos from Flickr.	Ecological	General public	SNS	N/A	Flickr	N/A	Quantitative	Both	150000000	Greater than 10000	January 2007 - December 2010	2-5 years	Yes	Recall is relatively low due to the sparsity of photos on a given day, precision can be high, suggesting that mining from photo sharing websites could be a reliable source of observational data for ecological research. Need for future studies on a variety of other ecological phenomena, including those for which high quality ground truthing is not available, such as migration patterns of wildlife.	Investigate additional features including using more sophisticated computer vision techniques to analyze visual content. Explore a variety of other ecological phenomena, including those for which high quality ground truth is not available, such as migration patterns of wildlife and the distributions of blooming flowers.	2
van Zanten et al. (2016)	2016	PNAS	N/A	Europe	N/A	Exploring the potential of geolocated social media content for spatial quantification of the values ascribed to landscapes by individuals enjoying them for aesthetic enjoyment and outdoor recreation. Evaluation of the use of web based photo sharing applications Panoramio and Flickr and the mobile photo sharing application Instagram.	Social	General public	SNS	N/A	Panoramio, Instagram and Flickr	N/A	Quantitative	Research	631828	Greater than 10000	2004 - 2015	Greater than 5 years	Yes	Panoramio, Flickr, and Instagram data can be used to quantify landscape values. Social media data can be used to improve our understanding of how and where individuals ascribe value to landscapes across social, political, and ecological boundaries.	Additional research efforts should address methods that enable a better understanding of the demographic characteristics of social media users and develop improved filtering techniques involving natural language and automatic image processing. More research focused in these areas will reduce the technological knowledge and expertise needed to examine social media data for any number of research a…	1
Levin et al. (2017)	2017	Applied Geography	Australia	Australia	N/A	Aims to compare user-generated information from several sources with official observations to determine the degree to which different Web 2.0 sources correspond and complement each other. The specific theme pursued here is the importance of protected areas as perceived by the public.	Social	General public	SNS and other	N/A	Flickr	Wikipedia, PPGIS, OpenStreetMap	Quantitative	Research	N/A	N/A	N/A	N/A	Yes	Crowdsourced data through Visitor Generated Information has potential to provide valuable information on place values and visitation for conservation planners and protected area managers. Crowdsourced databases have limitations in terms of spatial data quality and sampling bias.	Need for further validation of these data sources and addressing uncertainty in VGI data.	1
Minin et al. (2015)	2015	Frontiers in Environmental Science	N/A	N/A	N/A	We propose a framework on how social media data could be useful for conservation science and practice. We present the commonly used social media platforms and discuss how their content could provide new data and information for conservation science.	Both	General public	SNS	N/A	Facebook, Youtube, Twitter, LinkedIn, Flickr, Instagram	N/A	Both	Research	N/A	N/A	N/A	N/A	Yes	When combined with other sources of data, social media data can provide innovative ways to address the information needs of future conservation challenges.	Need to address: geographic and content biases, self-selecting users and ethical concerns in social media data research.	1, 2
Orsi, Geneletti (2013)	2013	Journal for Nature Conservation	Italy	Europe	N/A	We propose a new approach that uses geotagged photographs to identify popular locations, and a gravity model to estimate the volume of visitor flows from access points (e.g. parking lots, bus stops) to those locations.	Social	General public	SNS and other	N/A	Panaramio	Google Earth	Quantitative	Research	3356	1000-10000	2000-2011	Greater than 5 years	Yes	Geotagged photographs may provide an immediate source of information about people’s movements in natural areas and, with additional data, may improve monitoring in the future as the volume of online material grows. Particularly for poorly visited areas, this approach is an option to shed light on visitor flows and support responsible protected area management.	Future applications may include the analysis of off-trail movements to predict the intensity of trampling.	1
Pearson et al. (2016)	2016	The Annual Review of Environment and Resources	N/A	N/A	N/A	This review considers how social media is currently contributing to the development of a more sustainable society and directions for future work such that researchers and practitioners may more effectively utilize this technology.	Both	General public	Dedicated and SNS	BeeWatch ECOCEAN Whale Shark Photo-Identification Library	Facebook, Twitter, YouTube, Flickr, Instagram	N/A	Qualitative	Review	N/A	N/A	N/A	N/A	No	Informational, relational, and experiential functions of social media can be harnessed to foster greater proenvironmental concern and action.	Addresses the existing limitations and make work more clearly identifiable/accessible. More empirical research is needed to support the contributions social media can make to addressing environmental challenges, and which prioritizes sustainable behavior as the outcome variable. Future work should utilize diverse samples in terms of geographical location and should include groups that are not alr…	1, 2
Hausmann et al. (2017)	2017	Conservation Letters	South Africa	Africa	N/A	We explored the applicability of social media data in nature-based tourism by comparing preferences for biodiversity obtained from a traditional survey with observed preferences assessed from pictures shared on Instagram and Flickr by tourists.	Social	Tourists	SNS	N/A	Instagram, Flickr	N/A	Quantitative	Research	13600	Greater than 10000	2014	6 months - 1 year	Yes	Geotagged content mined from social media can be used as a reliable alternative to traditional survey-based methodologies to explore tourists’ preferences for biodiversity in protected areas.	N/A	1
Holmberg et al. (2008)	2008	Ecological Applications	Australia	Australia	Whale shark	Applying computer-assisted photo-identification mark-recapture population modeling to whale sharks at Ningaloo Marine Park (NMP), Western Australia, to create a baseline trend for comparison with other regional aggregations of the species.	Ecological	General public	Dedicated	ECOCEAN Whale Shark Photo-identification	N/A	N/A	Quantitative	Research	5100	1000-10000	1995-2005	Greater than 5 years	No	Analyzing and modeling mark-recapture data for a rare species using computer-assisted photo-identification and opportunistic data collection from ecotourism sources ensure the quality and volume of data required for population analysis.	Future modeling of South Ningaloo as a separate study area may provide additional guidance on how to better define target population.	2										1
Holmberg et al. (2009)	2009	Endangered Species Research	Australia	Australia	Whale shark	This study has expanded upon previous photo-identification studies of Ningaloo Marine Park whale sharks by estimating CMR survival and recruitment rates as functions of average total length (TL).	Ecological	General public	Dedicated	ECOCEAN Whale Shark Photo-identification	N/A	N/A	Quantitative	Research	6064	1000-10000	March to July 1995–2008	Greater than 5 years	No	Research demonstrates the scientific benefit from the development of online, collaborative data management systems to increase collection of sighting data for a rare species in conjunction with ecotourism activity.	N/A	2										1
Jacobsen (2007)	2007	Tourism Geographies	N/A	N/A	N/A	This study provides a review of photo-based landscape perception research approaches that can be used for assessment of tourists’ visual landscape perceptions.	Social	N/A	N/A	N/A	N/A	N/A	Qualitative	Review	N/A	N/A	N/A	N/A	N/A	Photo-based approaches useful in advancing research on visitor perceptions to benefit landscape management and environmental planning. These techniques are also relevant for the exploration of sustainability issues, environmental performance and destination images.	N/A	1
Dorwart et al. (2009)	2009	Leisure Sciences	USA	North America	N/A	Examining visitors’ perceptions and to determine how these perceptions affect their recreation experiences along a segment of the Appalachian Trail in Great Smoky Mountains National Park.	Social	Tourists	N/A	N/A	N/A	N/A	Qualitative	Both	274	100-500	September - October 2005	Less than 1 month	No	Proposed model could serve as a guide for future recreation behavior research and the development of tools/ instruments for measuring visitor perceptions. Potential area for future research lies in applying this technique with different age groups (e.g., children and adolescents), in varying natural environments, and with participants from different cultural backgrounds.	Future research using VEP in trail settings should be undertaken in various settings, in different seasons, and with larger and more varied samples. application of this technique with different age groups (e.g., children and adolescents), in varying natural environments, and with participants from different cultural back-grounds.	1
Dickinson et al. (2012)	2012	Frontiers in Ecology and the Environment	USA	North America	N/A	A review of the current state of citizen science as a tool for ecological research and public engagement.	Ecological	General public	Dedicated and SNS	iNaturalist eBird	Facebook	N/A	Qualitative	Review	N/A	N/A	N/A	N/A	Yes	In combining research with public education, citizen science also addresses broader societal impacts by engaging members of the public in authentic research experiences at various stages in the scientific process and using modern communication tools to recruit and retain participants. New developments in information science – especially in data informatics, graphical user interfaces, and geograph…	N/A	1
Parham (2015)	2015	N/A (Master's thesis)	Kenya	Africa	Zebra and Giraffe	This paper investigates the use of photos taken by citizen scientists to estimate population sizes of zebras and giraffes in the Nairobi National Park.	Ecological	General public	Dedicated	IBEIS	N/A	N/A	Quantitative	Research	9406	1000-10000	2015-03-01	Less than 1 month	No	A passive, appearance-based identication approach (photographic censusing) is capable of producing a population estimate and generating other useful statistics for the Nairobi National Park.	Future work on analyzing the populations within the NNP should place focus on completing and augmenting the data collected during the GZGC. The continuation of this passive monitoring is required to eventually produce a robust, unbiased population estimate, analyze seasonal trends in the ecosystem of the park, and potentially estimate the average life-expectancy of the animals. Need for additiona…	2
Carpentier et al. (2016)	2016	Journal of Experimental Marine Biology and Ecology	France	Europe	Green sea turtle	This paper studies the stability of facial scale patterns in identifying green sea turtles through the use of citizen science photo-identification.	Ecological	General public	Dedicated	TORSOOI (TORtues marines du Sud-Ouest de l'Océan Indien)	N/A	N/A	Quantitative	Research	149	100-500	11 years	Greater than 5 years	No	Citizen science photo-ID is a completely non-invasive technique which is of particular interest for species of conservation concern, such as sea turtles. Information obtained from photo-ID is highly valuable as it can help the development of effective conservation plans while also raising public awareness.	N/A	2
Meekan et al. (2006)	2006	Marine Ecology Progress Series	Australia	Australia	Whale shark	This study used photo-identification to produce estimates of population size and structure of whale sharks Rhincodon typus at Ningaloo Reef, Western Australia.	Ecological	Tourists	N/A	N/A	N/A	N/A	Quantitative	Research	581	500-1000	1992-2004	Greater than 5 years	No	Photo-identification offers a practical, non-destructive means to obtain data on the population size and demography of whale sharks. Standardized techniques need to be applied to the collection of photographic databases.	N/A	2										1
Barve (2014)	2014	Ecological Informatics	USA	North America	Snowy Owl and Monarch Butterfly	Exploration of a novel source of photo-vouchered biodiversity occurrence data, in the form of records associated with photos posted on social networking sites (SNSs).	Ecological	General public	SNS	N/A	Flickr	N/A	Quantitative	Research	63158	Greater than 10000	N/A	N/A	Yes	Examples highlight the richness of data available but also the the need to use common names in queries on Flickr and other SNSs to compliment scientific names. In today's world, if the data are not digital and not freely accessible, they are very hard to use. Digital Accessible Knowledge is crucial in biodiversity studies in light of the large numbers of species and records used in analysis and m…	Further work will be needed as well to assess the degree to which this data source is useful regarding less-well known elements of biodiversity beyond birds and butterflies. Finally, it will be very useful to explore more SNSs beyond Flickr, which might have promise for additional regions and taxonomic groups.	2
Stafford et al. (2010)	2010	PLoS ONE	UK	Europe	Bee	Using social networks, this paper assesses whether it is possible to obtain accurate data on bee distribution across the UK from photographic records submitted by untrained members of the public.	Ecological	General public	SNS	N/A	Facebook and Flickr	N/A	Quantitative	Research	156	100-500	April - June 2010	1-6 months	Yes	Social network data can have many potential uses including development of interactive maps of species distributions. Potential to use social network photosharing to monitor population sizes and measure behaviour and movement of individual animals using citizen scientists’ photographs. Challenges: slightly over 40% of photographs submitted were not correctly uploaded and limitations in the techniq…	N/A	2
Norman (1999)	1999	Pacific Conservation Biology	Australia	Australia	Whale shark	This papers reports years of residency of whale sharks on the Ningaloo Reef by use of tags and photo-identification.	Ecological	General public	Dedicated	Wildbook for Whale Sharks	N/A	N/A	Quantitative	Research	N/A	N/A	N/A	N/A	Yes	There is significant benefit in combining photo-identification through citizen science with minimal-impact electronic tracking studies to determine whale shark movements over an extended timeframe.	N/A	2										1
Markwell (1997)	1997	Annals of Tourism Research	Malaysia	Asia	N/A	This paper reports on an empirical study exploring the spatial, temporal, and social dimensions of photography in a nature-based tour experience.	Social	Tourists	N/A	N/A	N/A	N/A	Both	Research	2680	1000-10000	July, 1992 (3 weeks)	Less than 1 month	No	Photographic images of places and attractions help form expectations of the tour in the pre-travel stage, and the collected images brought home in the form of postcards/ photographs help shape memories of the trip in the post-travel stage. Reduction in number of photographs taken occurs as tourists transcend the "spectator" role to become more of a "participant".	N/A	1
White et al. (2015)	2015	Ecosphere	N/A	N/A	N/A	Exploration of a new approach in ecological research: "action ecology". How is this approach defined and how can it be distinguised from related subfields in applied ecology and ecological management.	Ecological	N/A	Dedicated and SNS and other	iNaturalist	Twitter and Facebook	Global Biodiversity Information Facility (GBIF) Map of Life	Qualitative	Review	N/A	N/A	N/A	N/A	N/A	Modern action ecology is strongly geared towards using transdisciplinary, technology-driven measures to provide targeted solutions to urgent ecological problems, These measures are growing increasingly reliant on ‘big data’ sources and global, rapid communication platforms for data acquisition.	Suggestion for a future of enhanced interdisciplinary work.	2
van der Wal et al. (2015)	2015	Ambio	UK	Europe	Bee	Assess the ability of traditional biological recording schemes and lay citizen science approaches to gather data on species distributions and changes	Ecological	General public	Dedicated and other	BeeWatch	N/A	National Biodiversity Network (NBN)	Quantitative	Research	10000	1000-10000	2011-2014	2-5 years	No	Lay citizen science records displayed more extensive geographic coverage, reflecting human population density, thus offering better opportunities to account for recording effort. Recommend the complementing of skilled naturalist recording with lay citizen science programmes to obtain nation-wide capability.	Further study on the quality of the relationships between recorders, recording schemes and societies, and the national repository.	2
Kirkhope & Williams (2010)	2010	N/A (IEEE conference proceedings)	UK	Europe	Bee	This paper presents an outline of a method that uses the photo-sharing website Flickr for mapping the distribution of bees throughout the UK.	Ecological	General public	SNS	N/A	Flickr	N/A	Quantitative	Research	N/A	N/A	N/A	N/A	Yes	Mapping the movements of a species through geo-tagged photos on social media is a cost-effective, valuable approach to the monitoring of wildlife.	Long-term data sets will allow changes in species distributions to be mapped, or changes in phenology (times of first and last sightings) to be recorded. In the long-term, such processes could be combined with automatic, computer identification of species, or even for some species, of individuals.	2
Arzoumanian et al. (2005)	2005	Journal of Applied Ecology	Australia	Australia	Whale shark	This paper describes a novel technique for identifying individual whale sharks through numerical pattern matching of their natural surface ‘spot’ colourations in tourist-produced photographs.	Ecological	General public	Dedicated	ECOCEAN Whale Shark Photo-identification	N/A	N/A	Quantitative	Research	N/A	N/A	N/A	N/A	No	An automated photo-identification technique has been established for whale sharks and the technique is expected to be extended to other species in the near future.	N/A	2										1
Lu & Stepchenkova (2011)	2011	Tourism Management	Costa Rica	South America	N/A	An exploratory investigation into the drivers of satisfaction and dissatisfaction in the context of ecotourism, with a focus on ecolodge stay experiences. The attributes pertinent to ecotourists’ satisfaction were identified using content analysis of qualitative datadonline reviews posted by ecotourists on the website TripAdvisor .	Social	Tourists	SNS	N/A	TripAdvisor	N/A	Both	Both	N/A	N/A	N/A	N/A	No	The selection of UGC as a data source allowed rich authentic data to be the basis for identification of satisfaction attributes. The study contributed to the literature through identification of ecolodge attributes that were specific for the U.S. ecotourist market. It suggested viable strategies to sort managerial priorities when customer satisfaction is the company’s goal.	Future satisfaction studies in a variety of tourism, hospitality, and business contexts.	1
Castley et al. (2012)	2012	Geographical Research	South Africa and Australia	Africa and Australia	N/A	This paper assesses what pre-visit pictures (photographic images) are used by online wildlife tour operators and if they reflect the species tourists may likely see when participating in a tour.	Social	Tour operators	N/A	N/A	N/A	Tour operator websites	Quantitative	Research	1154	1000-10000	N/A	N/A	No	It appears that the images used on the Internet by English tour operators are likely to reflect on-site experiences of the wildlife tourist to these destinations, based on the visibility of attractions. The visibility of wildlife and/or scenery appears to be a much more important selective filter in the use of online imagery than the status of any particular species.	Further work analysing the cross-cultural context and use of pictures representing attractions online, and indeed the increasing role of the Internet in forming and changing destination images is required.											7
Tenkanen et al. (2017)	2017	Scientific Reports	South Africa and Finland	Africa and Europe	N/A	Assessing usability of social media data for visitor monitoring in protected areas	Social	Tourists	SNS	N/A	Instagram, Flickr, Twitter	N/A	Quantitative	Research	83197	Greater than 10000	2014	6 months - 1 year	Yes
Hausmann et al. (2017b)	2017	Scientific Reports	Africa	Africa	N/A	Social media reveal that charismatic species are not the main attractor of ecotourists to sub-Saharan protected areas	Social	Tourists	SNS	N/A	Instagram	N/A	Quantitative	Research	92832	Greater than 10000	2015	6 months - 1 year	Yes
Sessions et al. (2016)	2016	Journal of Environmental Management	USA	North America	N/A	Measuring recreational visitation at U.S. National Parks with crowdsourced photographs	Social	Tourists	SNS	N/A	Flickr	N/A	Quantitative	Research		Greater than 10000	2007-2012	Greater than 5 years	Yes
Walden-Schreiner et al. (2018)	2018	Ambio	Argentina and Australia	South America and Australia	N/A	Using crowd-sourced photos to assess seasonal patterns of visitor use in mountain-protected areas	Social	General Public	SNS	N/A	Flickr	N/A	Quantitative	Research	~7000	1000-10000	2010-2016	Greater than 5 years	Yes
Walden-Schreiner (2017)	2017	N/A	USA and Australia	North America and Australia	N/A	Integrating Geospatial Resource use and Environmental Data at Varying Scales for Protected Area Conservation.	Social	General Public	SNS	N/A	Flickr	N/A	Quantitative	Research	~12000	Greater than 10000	2011-2015	2-5 years	Yes
																				Social	1	24	0.533333
																				Ecological	2	19	0.422222
																				Both	1, 2	2	0.0444444
																						45
